# Supplementary material for: Pan-Arctic Aerosol Number Size Distributions: Seasonality and Transport Patterns
Source: Copernicus journal article supplement (doi:10.5194/acp-2017-62), 2017-02-07
Supplement: Supplementary file 1 [file Fitting_Parameters_All_Percentiles.xlsx]

## Sheet: Alert
ALERT		Mode 1				Mode 2				Mode 3
(P10)		N	log sg	Dg		N	log sg	Dg		N	log sg	Dg
Jan		17.3461	0.273303	70		31.1776	0.166725	172.45		2.2718e-06	0.212248	240.541
Feb		20.0948	0.254755	70		31.6668	0.156436	166.714		1.20813	0.361728	200
Mar		29.5656	0.269872	70		49.5118	0.174364	165.553		1.08143e-07	0.271234	285.107
Apr		27.5478	0.225345	70		82.0906	0.167381	173.67		3.8959e-06	0.22019	268.956
May		4.81523	0.210393	46.5406		27.8593	0.144651	116.937		13.9379	0.136888	200.001
Jun		4.52003	0.139648	30.103		10.4973	0.203788	98.2472		0.000656537	0.267953	336.284
Jul		6.55168	0.11921	36.5877		12.0479	0.214709	84.3971		0.000611729	0.269455	327.254
Aug		7.85906	0.137338	30.1753		9.88345	0.216048	93.7188		4.68028e-08	0.280308	292.339
Sep		4.14298	0.145077	28.2235		6.65238	0.245161	99.4313		2.40607e-07	0.269358	302.536
Oct		5.99413	0.311072	53.5266		7.66217	0.148215	138.183		0.274087	0.0866359	301.841
Nov		11.2418	0.220372	51.8433		30.4949	0.176479	157.979		0.383532	0.095385	301.478
Dec		12.3587	0.244852	53.0608		21.2196	0.168412	148.275		0.48771	0.0835753	352.109
ALERT		Mode 1				Mode 2				Mode 3
(P25)		N	log sg	Dg		N	log sg	Dg		N	log sg	Dg
Jan		24.1306	0.261156	70		39.4721	0.157961	180.205		1.9982e-07	0.307019	442.574
Feb		25.011	0.25878	70		38.272	0.152006	172.717		5.26744	0.2756	200
Mar		39.9937	0.269728	70		62.001	0.172302	175.727		5.0354e-08	0.240422	275.877
Apr		42.1056	0.24905	70		94.4221	0.167519	175.51		4.16618e-08	0.347495	203.44
May		9.25357	0.181853	40.7321		44.5183	0.169466	125.951		16.8888	0.14201	200.001
Jun		15.2276	0.175972	32.4895		24.2091	0.198046	101.993		0.139577	0.0928372	287.117
Jul		27.5836	0.17616	43.0389		15.2917	0.162904	101.28		1.04277	0.116799	200
Aug		29.1302	0.200117	33.6908		18.2601	0.175301	106.822		0.0624094	0.0575236	368.046
Sep		10.8309	0.185074	29.8286		13.9371	0.199418	108.698		0.000155559	0.27123	328.145
Oct		10.0321	0.301661	54.9343		11.747	0.149015	144.89		0.30891	0.0749188	329.48
Nov		25.4716	0.279285	68.999		36.5085	0.175806	173.418		1.44148e-06	0.279298	302.212
Dec		23.0898	0.287902	65.7414		28.6329	0.173987	160.664		0.144522	0.0499639	409.497
ALERT		Mode 1				Mode 2				Mode 3
(P50)		N	log sg	Dg		N	log sg	Dg		N	log sg	Dg
Jan		27.4684	0.269443	62.2317		57.9423	0.182879	175.78		3.6279	0.0925488	200
Feb		32.3686	0.275457	70		61.7081	0.172188	177.693		0.685421	0.0659747	385.312
Mar		53.5084	0.2883	70		77.1902	0.174072	177.614		1.01524e-05	0.265594	265.173
Apr		58.5801	0.274058	67.7385		109.652	0.172087	174.255		2.00886e-06	0.27165	279.107
May		28.4541	0.210258	43.9687		69.969	0.18947	131.803		16.7943	0.139085	214.229
Jun		51.922	0.205437	35.6148		51.1491	0.188143	107.699		0.624586	0.117944	276.639
Jul		96.3324	0.233635	52.3468		7.08383	0.0932222	137.728		4.47894	0.124996	200.002
Aug		62.7967	0.167504	29.1005		56.0262	0.226611	85.7444		2.16393e-06	0.280678	336.428
Sep		31.1136	0.230485	29.9582		22.0738	0.170402	115.902		0.281015	0.0801262	335.747
Oct		13.2978	0.259531	49.4622		20.8537	0.165323	140.732		0.64113	0.0998669	311.609
Nov		30.2201	0.263473	63.0539		51.5156	0.17471	172.02		0.0881562	0.0413927	442.69
Dec		34.6389	0.287971	70		49.5403	0.177548	177.456		4.78406e-09	0.25015	312.705
ALERT		Mode 1				Mode 2				Mode 3
(P75)		N	log sg	Dg		N	log sg	Dg		N	log sg	Dg
Jan		49.9093	0.283079	70		76.306	0.167374	189.416		1.49768e-08	0.104769	292.169
Feb		38.5749	0.282823	66.2711		84.6664	0.182877	179.021		0.389024	0.0415356	201.264
Mar		28.3975	0.205987	37.3386		101.162	0.234167	132.882		38.0153	0.149094	200
Apr		91.8079	0.31059	65.3578		125.904	0.176114	173.943		1.37329e-06	0.229458	264.764
May		53.7786	0.178696	36.4811		89.0295	0.211613	110.75		44.9161	0.14027	200
Jun		140.349	0.233023	39.3745		54.8245	0.145773	117.657		16.3404	0.138842	200
Jul		222.923	0.304568	45.8746		12.5799	0.101944	139.013		6.52463	0.139634	200.646
Aug		214.581	0.22541	32.0478		44.7965	0.151837	117.76		3.30106	0.139037	252.514
Sep		63.4748	0.216544	29.2868		38.3937	0.172359	113.478		0.949469	0.0897778	302.021
Oct		22.85	0.250856	50.7597		27.363	0.169079	130.568		5.33882	0.155588	223.967
Nov		50.8127	0.294308	70		57.8316	0.167064	177.549		1.34912	0.084734	357.764
Dec		46.711	0.29651	70		68.2722	0.184069	175.102		6.65963	0.0970497	221.133
ALERT		Mode 1				Mode 2				Mode 3
(P90)		N	log sg	Dg		N	log sg	Dg		N	log sg	Dg
Jan		63.0868	0.282407	70		97.4055	0.171557	185.446		1.97812	0.0946284	419.186
Feb		53.6108	0.314224	70		95.9209	0.191692	180.689		6.0345	0.0932058	200
Mar		59.056	0.282246	46.5393		123.669	0.219173	149.929		29.374	0.13334	200
Apr		166.766	0.350902	59.7586		128.357	0.17276	177.931		6.71871e-07	0.280473	375.729
May		170.42	0.269111	42.3883		133.301	0.173827	175.343		0.857323	0.0414546	225.254
Jun		312.258	0.247192	31.1712		106.539	0.202796	125.377		7.49947e-05	0.258564	305.202
Jul		286.778	0.188366	30.6068		174.743	0.256207	85.7466		10.9427	0.127033	200
Aug		375.639	0.205421	26.2252		129.283	0.272619	86.053		8.3215	0.137396	200
Sep		153.429	0.271958	22.1035		63.7164	0.183871	115.809		0.888835	0.0784778	349.147
Oct		40.6654	0.242875	51.7475		25.218	0.128236	123.544		20.2373	0.135838	215.83
Nov		82.058	0.30167	70		74.7648	0.173645	189.061		1.87127e-08	0.0870621	308.842
Dec		62.151	0.307122	70		89.465	0.18325	175.183		4.40177	0.0901558	212.505

## Sheet: Barrow
BARROW		Mode 1				Mode 2				Mode 3
(P10)		N	log sg	Dg		N	log sg	Dg		N	log sg	Dg
Jan		9.16884	0.178908	48.4493		37.8376	0.175513	122.582		33.4714	0.190418	200.013
Feb		8.77016	0.158407	47.5547		55.3889	0.16713	121.482		56.3808	0.192704	200
Mar		17.7967	0.184222	60.5523		56.5263	0.152345	119.984		63.758	0.18014	200
Apr		15.8175	0.228014	70		47.6707	0.146469	127.575		53.5487	0.168873	200
May		11.8633	0.182473	70		51.693	0.135483	127.258		20.2696	0.142937	224.485
Jun		2.48464	0.102816	31.6534		22.4172	0.214235	112.342		0.153904	0.0709924	372.37
Jul		14.3763	0.158068	36.9437		17.6802	0.158504	99.2992		3.61508	0.151951	200
Aug		18.1248	0.318599	40.7756		12.6579	0.188691	121.727		0.136175	0.0560414	449.558
Sep		3.12753	0.159851	28.3517		16.2999	0.196007	117.811		1.82886	0.301876	266.972
Oct		2.40571	0.145923	27.5807		27.4474	0.233174	126.107		0.737452	0.118943	413.336
Nov		6.16803	0.28495	43.1896		41.1503	0.161561	142.677		12.6375	0.174096	238.374
Dec		9.73387	0.190654	54.2016		32.2859	0.144734	130.09		68.964	0.185491	200
BARROW		Mode 1				Mode 2				Mode 3
(P25)		N	log sg	Dg		N	log sg	Dg		N	log sg	Dg
Jan		21.8045	0.217554	59.5825		42.6871	0.168755	133.606		50.71	0.2058	200
Feb		18.2613	0.197977	54.2377		73.6069	0.170335	119.387		74.3162	0.202341	200
Mar		12.6575	0.180712	43.3738		135.371	0.216377	140.25		35.4999	0.208199	200.853
Apr		8.84179	0.176673	43.25		158.119	0.207553	156.426		5.11472e-06	0.249263	278.15
May		4.86036	0.127313	41.7305		141.507	0.181989	136.724		19.6838	0.129198	277.04
Jun		11.5996	0.15271	36.5817		41.708	0.16088	102.115		9.83987	0.155178	200
Jul		59.6245	0.208584	48.3218		22.8187	0.1444	112.853		7.24926	0.152642	200
Aug		27.5369	0.115825	30.8593		44.5239	0.199771	95.3795		4.52095	0.274169	200
Sep		4.8533	0.126578	28.0731		31.2133	0.20173	107.337		4.03773	0.282034	234.787
Oct		6.30897	0.218858	31.7158		27.724	0.186175	112.444		13.0155	0.225245	205.127
Nov		9.79558	0.232741	35.6001		47.8374	0.171387	129.498		34.0237	0.194061	200
Dec		21.094	0.242462	63.1011		49.6343	0.162813	132.263		80.6745	0.198997	200
BARROW		Mode 1				Mode 2				Mode 3
(P50)		N	log sg	Dg		N	log sg	Dg		N	log sg	Dg
Jan		44.2866	0.246184	62.5376		56.7141	0.162433	131.622		85.8894	0.199171	200
Feb		62.2374	0.323613	69.9997		122.543	0.212013	142.85		51.9027	0.253705	200.003
Mar		78.5719	0.361728	70		73.8661	0.16511	126.168		91.1244	0.188553	200
Apr		34.7609	0.259964	58.5471		95.7482	0.158969	128.438		105.212	0.181462	200
May		18.3967	0.156204	46.1636		128.478	0.146831	121.333		129.192	0.167725	200
Jun		47.2717	0.206582	40.3798		61.407	0.155213	113.791		16.5058	0.177797	200
Jul		199.44	0.295909	57.7598		9.89055	0.118463	147.231		4.73115	0.187189	246.035
Aug		102.723	0.160141	36.4735		45.5	0.13677	102.07		21.6949	0.185305	200
Sep		13.1368	0.163056	30.0497		60.4357	0.180254	104.752		11.2826	0.289778	200.541
Oct		8.42119	0.168236	28.895		45.1698	0.203394	115.597		17.9328	0.26447	200.01
Nov		30.4742	0.361723	42.168		88.0851	0.173773	140.998		25.1884	0.140291	264.947
Dec		20.1582	0.214559	41.8365		89.123	0.200304	129.198		101.819	0.223248	200.001
BARROW		Mode 1				Mode 2				Mode 3
(P75)		N	log sg	Dg		N	log sg	Dg		N	log sg	Dg
Jan		82.9897	0.361728	55.1488		228.712	0.233115	153.178		0.672839	0.0784307	254.337
Feb		112.824	0.319263	50.66		117.579	0.192207	135.28		101.148	0.226556	200.024
Mar		117.994	0.334175	43.5732		110.555	0.178792	131.702		111.278	0.208936	200
Apr		90.9435	0.361728	54.9763		175.728	0.16821	142.998		71.8463	0.164228	238.271
May		87.444	0.317997	70		190.641	0.164306	137.693		71.1696	0.156461	236.724
Jun		183.142	0.290454	35.4603		101.748	0.187092	131.756		3.02158	0.108785	345.733
Jul		392.36	0.29539	46.0952		34.0652	0.121144	143.422		21.5085	0.179775	225.54
Aug		279.242	0.246948	35.0643		35.8399	0.0996011	121.967		29.4791	0.186626	215.883
Sep		48.919	0.250245	32.7203		92.3669	0.159569	111.443		21.4108	0.256517	209.415
Oct		17.2314	0.173586	29.3978		61.1298	0.200601	115.688		29.6712	0.242072	200
Nov		50.8723	0.222303	34.1592		170.905	0.227536	158.124		1.67683e-05	0.327661	380.122
Dec		92.0227	0.361728	57.1762		193.972	0.209612	159.1		17.1621	0.1605	341.688
BARROW		Mode 1				Mode 2				Mode 3
(P90)		N	log sg	Dg		N	log sg	Dg		N	log sg	Dg
Jan		170.861	0.188281	23.4332		405.833	0.249676	129.804		7.67607	0.139418	409.113
Feb		252.879	0.361728	45.0471		93.7839	0.157037	126.025		152.761	0.20542	200
Mar		233.695	0.340983	34.7598		191.861	0.195822	144.569		75.6037	0.242915	215.016
Apr		288.378	0.361728	26.1848		112.834	0.159234	128.89		217.895	0.19764	200
May		128.204	0.361728	50.4959		326.569	0.203341	158.908		0.847337	0.0481081	324.759
Jun		685	0.345382	31.3172		23.455	0.0737534	127.4		56.792	0.13939	200
Jul		796.375	0.303421	44.689		0.01	0.361728	50		45.9665	0.135029	200
Aug		593.831	0.146467	20		284.313	0.25397	50		49.6793	0.183531	200
Sep		131.489	0.361728	31.8642		103.958	0.148474	119.049		52.8769	0.283446	201.751
Oct		37.8138	0.195867	27.276		123.048	0.221301	137.399		3.19576	0.0977639	450
Nov		157.247	0.318475	33.7631		201.625	0.233463	155.702		6.72259	0.361728	450
Dec		153.663	0.361728	37.2368		123.053	0.168009	112.666		183.667	0.204445	200

## Sheet: Nord
NORD		Mode 1				Mode 2				Mode 3
(P10)		N	log sg	Dg		N	log sg	Dg		N	log sg	Dg
Jan		13.3418	0.22745	48.3033		17.5705	0.145062	132.181		12.6631	0.196454	200
Feb		18.1475	0.228057	45.2349		41.0354	0.19227	147.431		0.407198	0.0413927	200
Mar		26.9194	0.311939	70		28.8873	0.153676	180.626		6.08746	0.296886	200
Apr		21.7855	0.184162	42.6573		121.216	0.193074	154.987		2.76964	0.101903	256.007
May		9.24596	0.15787	34.252		51.6918	0.206623	131.776		2.12653	0.100277	272.38
Jun		6.78931	0.361728	45.5715		0.339883	0.0535101	137.541		0.678638	0.0986156	200
Jul		12.734	0.165986	34.1911		6.68132	0.173999	101.687		0.281293	0.120303	200
Aug		11.7539	0.130042	29.3569		12.014	0.264736	76.5216		9.60527e-09	0.272838	319.236
Sep		7.16629	0.150768	32.1809		8.07012	0.183366	105.033		0.911729	0.210602	200.425
Oct		10.7647	0.303048	41.8341		15.1039	0.163974	128.026		0.336337	0.110058	314.117
Nov		15.7674	0.208442	39.6916		40.1592	0.193166	159.694		0.653798	0.0565918	254.987
Dec		10.3884	0.225189	44.6342		18.8529	0.166597	141.325		4.9784	0.214764	200.022
NORD		Mode 1				Mode 2				Mode 3
(P25)		N	log sg	Dg		N	log sg	Dg		N	log sg	Dg
Jan		32.7653	0.33473	70		32.7491	0.183887	168.062		1.7112	0.361728	450
Feb		32.9065	0.30409	53.2327		41.2919	0.170573	160.244		1.08455	0.0858923	437.574
Mar		38.7863	0.316269	57.8311		75.7267	0.193806	168.419		0.155898	0.0462467	450
Apr		31.7321	0.197634	42.3307		147.448	0.204868	155.598		1.2745	0.0664865	233.051
May		17.6341	0.159426	35.9547		72.0902	0.222111	131.397		2.27815	0.0906092	243.2
Jun		7.31881	0.162843	25.4277		25.7458	0.299596	75.0578		0.289567	0.151566	200
Jul		35.7577	0.207011	38.1771		9.86129	0.131868	107.684		2.20797	0.11674	200
Aug		43.686	0.189918	32.6593		11.8644	0.152097	103.475		1.38757	0.169809	200
Sep		22.0466	0.23302	29.7598		12.8881	0.162269	110.853		2.31444	0.174759	200.001
Oct		14.8204	0.251987	36.3629		23.9372	0.175485	125.811		0.437828	0.107717	350.93
Nov		21.475	0.22678	41.4794		55.5999	0.187617	164.085		0.159979	0.359197	448.789
Dec		17.4473	0.273926	45.1935		35.2083	0.189786	155.604		0.665786	0.0880782	442.905
NORD		Mode 1				Mode 2				Mode 3
(P50)		N	log sg	Dg		N	log sg	Dg		N	log sg	Dg
Jan		48.2348	0.361728	64.1113		39.401	0.168025	175.492		15.57	0.361727	200
Feb		42.2041	0.31125	49.4153		49.4465	0.176158	161.322		17.755	0.247215	200.025
Mar		46.0854	0.281209	44.8367		103.953	0.206489	161.415		2.78247	0.0777763	204.248
Apr		50.7596	0.230403	43.1465		175.741	0.203214	160.471		1.62455	0.0650774	236.883
May		38.2091	0.191742	37.4324		97.8987	0.220391	138.232		3.76493	0.0901715	233.267
Jun		78.8881	0.34137	38.6133		17.7935	0.146166	121.203		4.1349	0.141649	239.368
Jul		105.81	0.262678	40.6303		14.3354	0.135768	126.747		4.22961	0.144147	229.253
Aug		116.585	0.262366	31.3111		11.2936	0.112445	117.12		4.90725	0.137761	200
Sep		60.436	0.333793	26.0382		23.1321	0.164608	122.035		1.48801	0.151558	286.44
Oct		29.1024	0.306355	39.3568		26.5689	0.149216	127.736		3.95245	0.140043	251.852
Nov		39.9713	0.315035	50.5558		61.9968	0.177842	171.711		1.78056	0.361665	449.96
Dec		35.4872	0.361728	49.7141		51.065	0.186948	171.379		0.564592	0.361704	449.978
NORD		Mode 1				Mode 2				Mode 3
(P75)		N	log sg	Dg		N	log sg	Dg		N	log sg	Dg
Jan		63.0816	0.361728	50.9691		76.3662	0.193186	184.96		24.289	0.337265	200
Feb		61.1241	0.361728	47.6023		50.4842	0.167627	158.812		47.9531	0.238742	200
Mar		76.0081	0.336444	35.0746		140.137	0.224527	166.698		4.04772	0.0974173	222.731
Apr		99.511	0.320659	51.7092		188.427	0.198774	170.357		1.91205	0.0767772	242.74
May		107.242	0.254749	38.9051		135.285	0.204592	162.226		6.73033	0.0826331	249.649
Jun		219.085	0.361726	26.5857		37.5796	0.146091	129.334		6.23892	0.128686	270.432
Jul		211.305	0.305311	37.4543		45.7992	0.174557	135.125		0.720759	0.0415678	303.514
Aug		298.829	0.338102	22.6603		25.0382	0.127367	123.959		9.49962	0.179866	200.001
Sep		149.201	0.348882	21.3474		34.4526	0.150619	124.26		6.37353	0.163623	234.69
Oct		55.843	0.361728	42.3689		27.6716	0.151614	137.936		11.0743	0.1887	200.001
Nov		64.2062	0.361728	53.5696		72.9606	0.185014	175.374		4.81617	0.354655	200
Dec		51.6552	0.361728	40.2048		80.015	0.210864	173.098		4.63549	0.0851957	204.706
NORD		Mode 1				Mode 2				Mode 3
(P90)		N	log sg	Dg		N	log sg	Dg		N	log sg	Dg
Jan		76.8188	0.361728	38.5067		150.388	0.202322	171.989		65.5736	0.361728	200
Feb		70.9811	0.361728	39.9709		113.723	0.162567	168.002		85.2789	0.316523	200
Mar		115.742	0.361728	29.3714		158.228	0.205296	175.675		26.0615	0.361728	200
Apr		166.7	0.361727	52.5492		204.988	0.187265	182.322		0.000801742	0.248361	266.136
May		267.053	0.361728	26.9433		188.042	0.19245	180.584		1.36217e-06	0.318545	220.029
Jun		528.03	0.267948	21.3532		65.1584	0.142349	109.154		32.9054	0.165409	200
Jul		393.612	0.361728	28.3075		67.8911	0.181179	133.405		3.60391	0.0953816	317.668
Aug		363.81	0.187064	20		208.922	0.361728	61.2574		1.28263e-09	0.361303	440.938
Sep		244.355	0.242858	20		93.5422	0.224931	108.268		0.903349	0.085957	379.042
Oct		89.5185	0.361728	37.167		61.1379	0.203286	157.946		1.84371	0.102948	200
Nov		85.7487	0.361728	45.7203		78.5324	0.190331	173.011		36.0271	0.361728	200
Dec		80.9366	0.361728	38.9924		113.992	0.20871	184.25		7.33556	0.34943	200

## Sheet: Tiksi
TIKSI		Mode 1				Mode 2				Mode 3
(P10)		N	log sg	Dg		N	log sg	Dg		N	log sg	Dg
Jan		42.3833	0.299379	70		0.0413935	0.0482344	55.1838		41.6276	0.185889	210.136
Feb		34.7267	0.241367	53.6459		73.9196	0.229533	160.128		10.3567	0.113127	243.791
Mar		32.6644	0.208165	53.7426		81.9576	0.203758	161.168		3.61186	0.0890376	243.442
Apr		38.6947	0.322266	63.9445		81.8408	0.175819	174.937		0.000225124	0.278166	300.741
May		2.98812	0.119512	32.0059		38.3798	0.234646	129.875		0.787795	0.093735	234.288
Jun		7.59792	0.218827	36.7975		17.975	0.155469	125.495		0.081999	0.0707392	428.121
Jul		13.2048	0.144617	34.3447		14.9035	0.194136	108.257		1.99788e-06	0.269481	355.633
Aug		15.2329	0.199273	40.2102		17.8558	0.145365	138.891		0.317998	0.0827985	402.021
Sep		8.00823	0.194257	31.0474		10.6754	0.173702	136.953		0.12286	0.0413936	200
Oct		14.7144	0.271593	44.0558		18.4316	0.181244	164.807		1.27118e-05	0.271409	302.602
Nov		34.7124	0.308238	56.0075		33.98	0.175138	182.575		1.60593	0.358194	445.591
Dec		26.7679	0.235363	48.8263		47.4875	0.224233	162.435		15.0933	0.147829	221.082
TIKSI		Mode 1				Mode 2				Mode 3
(P25)		N	log sg	Dg		N	log sg	Dg		N	log sg	Dg
Jan		3.11574	0.361609	20.0167		89.2285	0.342222	101.388		24.8925	0.144036	221.196
Feb		75.8408	0.283097	70		84.6969	0.210725	178.108		2.8001e-09	0.286578	287.42
Mar		44.8387	0.192843	48.9036		123.627	0.206989	156.532		5.11153	0.104026	237.303
Apr		50.2941	0.276126	53.4222		86.8367	0.185309	162.02		27.0603	0.133591	200
May		10.09	0.170539	36.85		53.0883	0.226135	138.795		0.00430293	0.286213	318.604
Jun		20.2226	0.166655	34.5531		43.4291	0.154323	119.848		2.49506	0.0982404	260.808
Jul		37.8697	0.165372	38.117		22.6211	0.171118	116.77		0.21369	0.0836641	394.545
Aug		38.209	0.199276	38.9601		30.9081	0.151475	142.462		0.610582	0.0768682	403.469
Sep		21.627	0.196268	36.6007		23.1394	0.175629	138.113		0.317577	0.0886873	449.836
Oct		36.7006	0.258532	44.1291		44.1853	0.178099	175.297		1.28415e-06	0.273957	274.97
Nov		28.4773	0.231217	40.0851		21.4676	0.192294	101.681		42.017	0.170423	200
Dec		45.6106	0.292312	58.3708		59.7852	0.19028	193.926		0.195835	0.0413927	317.548
TIKSI		Mode 1				Mode 2				Mode 3
(P50)		N	log sg	Dg		N	log sg	Dg		N	log sg	Dg
Jan		86.5339	0.277298	70		74.4334	0.192422	202.463		1.9068e-08	0.200973	295.678
Feb		116.539	0.303695	70		90.3636	0.202075	178.957		2.47682e-08	0.0729454	359.102
Mar		148.31	0.361728	70		101	0.18356	169.166		5.29276	0.0716722	244.007
Apr		104.629	0.286953	53.1468		153.525	0.181903	168.393		1.15337e-06	0.253857	286.692
May		45.0853	0.31868	50.3982		64.7713	0.193977	167.906		2.2392	0.0811462	257.655
Jun		103.251	0.186534	36.9586		91.3209	0.170502	104.259		13.8381	0.144317	200
Jul		110.633	0.206891	37.4384		32.8893	0.153394	122.049		3.29918	0.184887	200.011
Aug		110.681	0.226953	42.9675		60.8846	0.175379	150.38		0.927808	0.0896013	436.453
Sep		94.3382	0.199597	44.5872		21.4818	0.119029	131.412		31.6723	0.148992	200
Oct		78.1132	0.235064	46.5258		60.4133	0.182744	172.902		10.3074	0.0896532	214.224
Nov		57.2716	0.290796	45.6714		63.3599	0.224037	166.84		10.7427	0.117972	215.574
Dec		76.418	0.30336	67.7869		7.82331	0.0978609	165.077		49.6046	0.176673	220.34
TIKSI		Mode 1				Mode 2				Mode 3
(P75)		N	log sg	Dg		N	log sg	Dg		N	log sg	Dg
Jan		30.6786	0.249698	30.2513		161.809	0.311562	111.152		28.9743	0.139783	226.253
Feb		32.3162	0.361728	20		188.489	0.316115	85.1918		67.9929	0.17749	200
Mar		238.136	0.361728	53.1036		174.561	0.191988	178.162		3.50117e-06	0.198733	354.29
Apr		170.878	0.242835	41.6434		215.393	0.194989	148.268		26.9521	0.111711	229.695
May		107.601	0.359288	53.2855		55.2376	0.268904	143.789		50.1955	0.134765	205.489
Jun		535.394	0.319937	52.6366		20.1603	0.0902708	57.5446		15.7491	0.119747	200
Jul		404.238	0.226575	39.2274		22.6149	0.0901936	138.404		14.6287	0.105937	200
Aug		371.066	0.323639	48.2246		15.7537	0.101371	139.323		69.5053	0.154528	200
Sep		221.664	0.233165	43.0259		53.9778	0.160289	124.427		64.3554	0.164579	209.493
Oct		166.374	0.293725	47.0615		92.3325	0.167382	193.134		0.00308868	0.205311	256.003
Nov		127.671	0.361728	50.5719		63.4051	0.189437	190.636		3.04251	0.298261	200
Dec		135.942	0.336844	68.0422		32.4921	0.134005	180.636		26.112	0.160737	278.781
TIKSI		Mode 1				Mode 2				Mode 3
(P90)		N	log sg	Dg		N	log sg	Dg		N	log sg	Dg
Jan		49.3537	0.133728	24.6789		219.594	0.198084	59.5604		120.663	0.183136	200
Feb		34.5836	0.104644	21.3595		304.402	0.323529	82.828		66.043	0.183275	200
Mar		159.838	0.361728	20.8272		433.829	0.361728	79.3061		116.793	0.13437	201.622
Apr		516.811	0.361728	43.1942		207.737	0.167173	172.372		4.82223	0.0572277	261.135
May		233.171	0.209344	43.0349		305.498	0.202044	161.864		19.6198	0.112087	264.719
Jun		1153.91	0.326612	49.8964		0.0100646	0.324127	249.989		45.0073	0.145831	200
Jul		960.986	0.232092	40.6274		18.5641	0.0642952	151.655		27.7606	0.107532	211.029
Aug		795.329	0.361728	38.2829		32.1392	0.0861555	111.271		172.716	0.192492	203.231
Sep		394.693	0.232732	39.0275		78.5044	0.12167	98.3145		154.577	0.190159	200
Oct		365.524	0.351046	47.5023		47.1785	0.117521	157.387		78.528	0.140985	258.504
Nov		158.503	0.30708	31.0088		114.049	0.260402	143.938		24.1104	0.128234	200
Dec		339.127	0.231299	39.6968		50.1865	0.135359	164.008		53.42	0.172578	247.257

## Sheet: Zeppelin
ZEPPELIN		Mode 1				Mode 2				Mode 3
(P10)		N	log sg	Dg		N	log sg	Dg		N	log sg	Dg
Jan		3.39638	0.244665	30.4864		3.94086	0.208278	140.115		0.606085	0.151305	264.696
Feb		3.57289	0.314365	69.8891		1.74833	0.136918	133.569		3.65551	0.180707	200.001
Mar		5.96119	0.210852	37.0148		12.1763	0.163336	156.496		4.81827	0.361727	200
Apr		9.50568	0.185465	37.8169		37.8527	0.186273	155.702		5.69402	0.103611	200
May		13.0723	0.179256	40.4811		30.3555	0.197472	150.205		2.12	0.0886493	204.745
Jun		13.7769	0.21156	34.8951		11.0996	0.160906	111.461		1.99926	0.144996	200
Jul		14.2432	0.186507	34.0019		11.5917	0.181592	101.514		0.508058	0.113157	225.876
Aug		11.2398	0.145529	30.7234		6.58282	0.220604	87.7312		3.77842e-07	0.276044	321.694
Sep		5.05529	0.158804	30.1162		4.32884	0.246878	82.2193		1.00758e-05	0.27063	314.093
Oct		4.29108	0.344898	44.2284		2.3209	0.171684	130.637		0.0191202	0.250714	290.78
Nov		2.95902	0.205077	35.9163		6.10357	0.199094	160.438		0.108735	0.0413927	200
Dec		2.48858	0.165966	27.2076		4.73611	0.256287	118.484		1.66882	0.176037	200
ZEPPELIN		Mode 1				Mode 2				Mode 3
(P25)		N	log sg	Dg		N	log sg	Dg		N	log sg	Dg
Jan		6.31498	0.215276	33.0649		14.5724	0.224554	170.151		2.55085	0.103735	215.96
Feb		10.6814	0.330225	41.9977		17.4221	0.143493	179.619		6.55582	0.266856	200
Mar		18.7034	0.361728	49.6285		36.2867	0.148983	185.108		4.28266	0.301003	200
Apr		22.7116	0.248244	43.8588		61.1634	0.174316	173.089		0.00267229	0.268201	297.061
May		33.5763	0.214822	40.1425		61.1615	0.194751	155.088		2.37941	0.0888061	223.108
Jun		35.5163	0.199397	36.0177		24.8978	0.160403	111.804		7.41446	0.146692	200
Jul		48.2665	0.228426	37.9048		22.4744	0.155275	113.936		5.48112	0.140748	200
Aug		29.9424	0.160234	32.0975		23.2122	0.232718	89.4743		3.34754e-05	0.274931	328.212
Sep		14.2605	0.182128	32.0059		11.4282	0.217271	105.781		3.33429e-07	0.276732	315.284
Oct		8.67509	0.303792	40.693		9.17613	0.177418	143.353		0.251453	0.100039	349.784
Nov		10.0887	0.356875	43.7726		13.6566	0.181294	184.594		0.117049	0.277298	267.065
Dec		5.13521	0.18387	27.8642		10.8531	0.281508	136.331		5.23911	0.135163	204.525
ZEPPELIN		Mode 1				Mode 2				Mode 3
(P50)		N	log sg	Dg		N	log sg	Dg		N	log sg	Dg
Jan		19.6062	0.361728	41.0526		4.47145	0.0686645	237.641		35.0962	0.17632	200
Feb		30.1393	0.361728	45.884		38.5335	0.132233	193.8		15.9467	0.214606	200
Mar		38.3948	0.361728	58.5396		54.2999	0.137559	192.64		18.9006	0.233867	200
Apr		40.149	0.232685	38.9324		68.9868	0.212846	151.344		32.5854	0.140719	201.944
May		105.53	0.262827	33.3247		37.7902	0.139337	119.712		57.6151	0.156134	200
Jun		102.241	0.221909	35.292		47.3609	0.144937	115.395		22.7079	0.142426	200
Jul		147.843	0.265989	41.3759		25.751	0.119406	122.743		17.5083	0.130629	200
Aug		102.388	0.219618	35.3269		32.9832	0.163697	120.523		4.67177	0.196437	200.047
Sep		43.141	0.25534	34.145		22.9768	0.18597	119.969		1.73974	0.243268	203.816
Oct		16.0722	0.265752	38.5628		19.2412	0.173721	149.523		4.23747	0.300778	200.001
Nov		14.2487	0.270734	32.8944		31.8032	0.217513	164.945		2.33794	0.0819313	249.871
Dec		14.9062	0.275753	33.44		23.7119	0.215241	176.618		10.0944	0.102844	222.918
ZEPPELIN		Mode 1				Mode 2				Mode 3
(P75)		N	log sg	Dg		N	log sg	Dg		N	log sg	Dg
Jan		41.3089	0.361728	41.9001		76.9348	0.156615	202.299		3.38264e-08	0.346012	348.875
Feb		49.1679	0.256619	40.5714		111.661	0.172086	184.169		11.262	0.0625682	214.275
Mar		52.4279	0.262675	45.7483		137.528	0.180961	181.791		16.4748	0.0694888	210.221
Apr		135.579	0.361728	45.2405		121.386	0.185065	187.302		8.95586e-06	0.262162	279.742
May		360.162	0.361728	24.3604		42.1174	0.146216	131.531		74.6675	0.163481	200
Jun		338.354	0.28394	32.3092		67.6327	0.145458	131.092		39.6054	0.16282	200
Jul		419.109	0.361728	30.5358		68.6289	0.237783	111.495		22.3882	0.130303	200
Aug		292.916	0.310016	35.5291		25.7893	0.115822	131.181		22.8933	0.141728	200
Sep		98.4137	0.2688	32.404		50.1694	0.188218	124.454		2.13563	0.13727	338.973
Oct		24.6722	0.204053	33.5322		52.3487	0.219816	150.773		2.51706	0.0827554	262.006
Nov		31.8245	0.361726	32.0342		50.662	0.214882	167.906		8.56218	0.101256	245.661
Dec		31.3611	0.310065	35.586		63.1547	0.179308	192.45		9.99671	0.0823075	234.703
ZEPPELIN		Mode 1				Mode 2				Mode 3
(P90)		N	log sg	Dg		N	log sg	Dg		N	log sg	Dg
Jan		72.6758	0.289244	35.428		123.248	0.168787	193.014		3.28003e-05	0.277353	283.476
Feb		102.039	0.305469	45.5313		186.353	0.159154	186.603		1.37449	0.361721	449.995
Mar		127.673	0.361728	58.2933		217.614	0.158887	186.706		5.50684	0.361727	449.999
Apr		256.896	0.361728	44.06		22.0503	0.0760931	238.637		157.723	0.185133	200
May		844.981	0.361728	20		171.329	0.211779	167.083		7.23582e-09	0.361598	449.666
Jun		1096.83	0.36103	24.2379		48.5604	0.107053	130.339		67.948	0.149778	200
Jul		877.475	0.361728	20		280.995	0.338114	98.5664		2.38271e-09	0.343999	210.535
Aug		704.197	0.354307	33.3878		20.2233	0.100263	147.09		28.2892	0.141967	218.216
Sep		174.757	0.245366	26.0123		136.516	0.273531	107.575		5.24219	0.0886171	200
Oct		56.75	0.256001	38.7838		75.2776	0.210516	158.815		12.0938	0.0875753	266.993
Nov		52.5378	0.361717	27.3036		84.5244	0.223941	164.299		21.5125	0.114249	239.288
Dec		51.8536	0.245328	37.737		125.016	0.17036	172.763		45.6253	0.336607	200
